# Supplementary material for: The Crystal Structure of the Hsp90-LA1011 Complex and the Mechanism by Which LA1011 May Improve the Prognosis of Alzheimer’s Disease
Source: MDPI journal article supplement (doi:10.3390/biom13071051), 2023-06-28
Supplement: s1 [file s1]

**Table S1.** Summary of the ITC data for the binding interactions using Hsp90, FKBP51 and LA1011.

| Cell component and concentration                    | Injectant and concentration      | <i>K<sub>d</sub></i>                                                | N              | Comment                              |
|-----------------------------------------------------|----------------------------------|---------------------------------------------------------------------|----------------|--------------------------------------|
| 30 $\mu$ M Hsp90                                    | 400 $\mu$ M FKBP51               | -                                                                   | -              | One site fit.<br>Overall, a poor fit |
| 30 $\mu$ M Hsp90                                    | 400 $\mu$ M FKBP51               | $K_d = 0.5 \pm 0.1 \mu\text{M}$<br>$K_d = 32.4 \pm 6.3 \mu\text{M}$ | -              | Two site fit                         |
| 30 $\mu$ M Hsp90                                    | 400 $\mu$ M FKBP51- $\Delta$ 7He | $K_d = 11.6 \pm 1.1 \mu\text{M}$                                    | 1.25           | -                                    |
| 30 $\mu$ M Hsp90                                    | 1 mM LA1011                      | $K_d = 13.1 \pm 1.7 \mu\text{M}$                                    | 0.5<br>(fixed) | -                                    |
| 30 $\mu$ M Hsp90<br>60 $\mu$ M FKBP51               | 1 mM LA1011                      | $K_d = 108 \pm 3.0 \mu\text{M}$                                     | 0.5<br>(fixed) | -                                    |
| 30 $\mu$ M Hsp90<br>60 $\mu$ M FKBP51- $\Delta$ 7He | 1 mM LA1011                      | $K_d = 17.9 \pm 1.27 \mu\text{M}$                                   | 0.5<br>(fixed) | -                                    |
| 30 $\mu$ M Hsp90<br>1 mM LA1011                     | 400 $\mu$ M FKBP51               | $K_d = 2.1 \pm 0.2 \mu\text{M}$                                     | 1.0            | One site fit                         |
| 30 $\mu$ M Hsp90<br>1 mM LA1011                     | 400 $\mu$ M FKBP51               | $K_d = 5.2 \pm 2.7 \mu\text{M}$<br>$K_d = 2.7 \pm 1.9 \mu\text{M}$  | -              | Two site fit                         |
